# Supplementary material
Source: Elsevier journal article supplement (https://www.sciencedirect.com/science/article/pii/S2173572717300371)
Supplement: mmc3 [file S2173572717300371:mmc3.doc]

**PIES DE FIGURAS MATERIAL ELECTRÓNICO SUPLEMENTARIO**

**Figura 4 (Material Electrónico Suplementario):** Proceso de donación en Muerte Encefálica.

*Se muestra el porcentaje de casos perdidos en cada fase del proceso, sobre el total de casos que permanece de la fase anterior. La tasa de donación corresponde al porcentaje de posibles donantes que se convierten en donantes eficaces en muerte encefálica.*

*CT: Coordinador de Trasplantes; ME: Muerte Encefálica*

**Figura 5 (Material Electrónico Suplementario):** Proceso de Donación en Asistolia Controlada.

*Se muestra el porcentaje de casos perdidos en cada fase del proceso, sobre el total de casos que permanece de la fase anterior. La figura se inicia con todos los posibles donantes (primer paso), seguidos de aquellos que fallecen intubados/ventilados (segundo paso). El tercer paso corresponde a los posibles donantes intubados/ventilados que fallecen tras una LTSV (pacientes que no evolucionaron a muerte encefálica o en lo que dicho diagnóstico no se confirmó, y tampoco fallecidos tras una PCR no esperada). Este tercer paso representa el potencial de DAC. La tasa de donación corresponde al porcentaje de posibles donantes que se convierten en donantes eficaces en asistolia.*

*CT: Coordinador de Trasplantes; DAC: Donación en Asistolia Controlada; LTSV: Limitación de Tratamiento de Soporte Vital*
